# Supplementary material for: Microwave-assisted synthesis of novel non-peripherally substituted metallophthalocyanines and their sensing behaviour for a broad range of Lewis bases
Source: Royal Society of Chemistry journal article supplement (doi:10.1039/c5dt00852b), 2015-01-01
Supplement: c5dt00852b1.pdf [file c5dt00852b1.pdf]

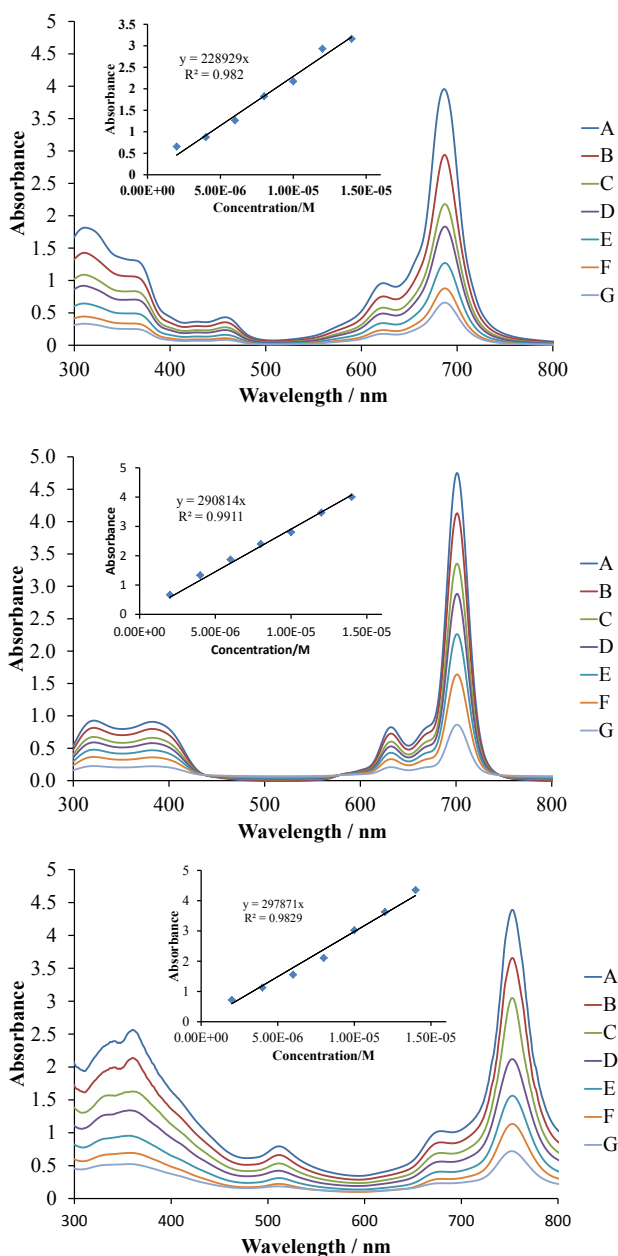

**Fig.** Aggregation behavior of 4-6 in DMF at different concentrations:  $14 \times 10^{-6}$  (A),  $12 \times 10^{-6}$  (B),  $10 \times 10^{-6}$  (C),  $8 \times 10^{-6}$  (D),  $6 \times 10^{-6}$  (E),  $4 \times 10^{-6}$  (F), and  $2 \times 10^{-6}$  (G) M.
